# Supplementary material for: A Squalene-Based Nanoemulsion for Therapeutic Delivery of Resiquimod
Source: MDPI journal article supplement (doi:10.3390/pharmaceutics13122060), 2021-12-02
Supplement: s1 [file s1]

# Supplementary Materials: A Squalene-Based Nanoemulsion for Therapeutic Delivery of Resiquimod

Zhongkun Zhang, Chun-Tien Kuo, Chi Zhang, Yirui Huang, Zerui Zhou and Robert J. Lee

**Table S1.** Cd3e, Cd4, Cd8a, Foxp3, and Ifng primers used in the RT-qPCR for tumor tissues and splenocytes.

| Target Gene | Forward Sequence (5' – 3') | Reverse Sequence (3' – 5') | GenBank Number |
|-------------|----------------------------|----------------------------|----------------|
| Cd3e        | GCTCCAGGATTTCTCG-GAAGTC    | ATGGC-TACTGCTGTCAGGTCCA    | NM_007648.5    |
| Cd4         | GTTTCAG-GACAGCGACTTCTGGA   | GAAGGA-GAACTCCGCTGACTCT    | NM_013488.3    |
| Cd8a        | ACTACCAAGCCAG-TGCTGCGAA    | ATCACAGGCGAAGTCCAA TCCG    | NM_001081110.2 |
| Foxp3       | CCTGGTTGTGA-GAAGGTCTTCG    | TGCTCCAGAGACTGCAC-CACTT    | BC132333.1     |
| Ifng        | CAGCAACAG-CAAGGCGAAAAAGG   | TTTCCGCTTCCTGAGGCTG-GAT    | BC119063.1     |

**Table S2.** Particle Sizes (nm with PDI value) of empty NE and R848 NE at 4°C for 6-month stability test.

|         | Empty NE     | R848 NE      |
|---------|--------------|--------------|
| Day 1   | 145.9 (0.17) | 104.1 (0.30) |
| Day 180 | 145.8 (0.23) | 102.3 (0.34) |

**Table S3.** Tumor growth inhibition on day 10 for individual mice treated with R848 NE, free SD-101, and R848 NE/ SD-101 combination.

| Treatment Group | TGI%   |
|-----------------|--------|
| R848 NE         | 30.23  |
|                 | 39.51  |
|                 | 48.89  |
|                 | 64.05  |
|                 | 70.89  |
| Free SD-101     | 48.12  |
|                 | 56.11  |
|                 | 68.32  |
|                 | 69.25  |
|                 | 81.45  |
| R848 NE/SD-101  | 36.32  |
|                 | 85.58  |
|                 | 98.05  |
|                 | 99.77  |
|                 | 104.73 |

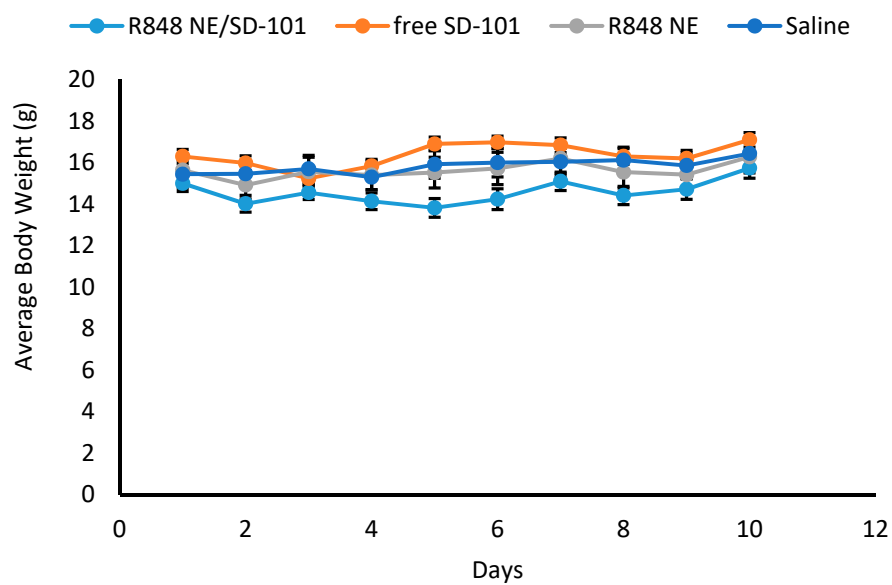

**Figure S1.** Bodyweight change among mice treated with saline, R848 NE, free SD-101, and R848 NE/SD-101 combination during the course.
